# Supplementary material
Source: Royal Society of Chemistry journal article supplement (doi:10.1039/d6gc01716a)
Supplement: d6gc01716a1.pdf [file d6gc01716a1.pdf]

## **Solvent Recycling in Solid-Phase Peptide Synthesis (SPPS): Combination of a Swellable Macroporous Polystyrene (SMPS) Resin and Green Binary Solvents**

Mani Kaushal<sup>a</sup>, Sikabwe Noki<sup>a,b</sup>, Yuxing Yang<sup>c</sup>, Chaoyang Wang<sup>c</sup>, Cheng Zhang<sup>c</sup>, Alesandra Basso<sup>3</sup>, Simona Serban<sup>c</sup>, Dan Wu<sup>c</sup>, Yanjun Li<sup>c</sup>, Xiaokang Kou<sup>c</sup>, Ashish Kumar<sup>a</sup>, Anamika Sharma<sup>a</sup>, Beatriz G de la Torre<sup>b\*</sup>, Fernando Albericio<sup>a,d\*</sup>

<sup>1</sup>Peptide Science Laboratory, School of Chemistry and Physics, University of KwaZulu-Natal, Durban 4001, South Africa

<sup>2</sup>School of Laboratory Medicine and Medical Sciences, College of Health Sciences, University of KwaZulu-Natal, Durban 4041, South Africa

<sup>3</sup>Sunresin New Materials, Sunresin Park, No. 135 Jinye Rd, Xi'an Hi-tech Industrial Development Zone, Shaanxi, 710076, China

<sup>4</sup>Department of Inorganic and Organic Chemistry, University of Barcelona, Martí i Franqués 1-11, 08028-Barcelona, Spain

### **Corresponding Authors:**

Professor Beatriz G de la Torre, School of Laboratory Medicine and Medical Sciences, College of Health Sciences, University of KwaZulu-Natal, Durban 4041, South Africa. Email: [garciadelatorreb@ukzn.ac.za](mailto:garciadelatorreb@ukzn.ac.za). Phone: +27 614 047 528

Professor Fernando Albericio, Peptide Science Laboratory, School of Chemistry and Physics, University of KwaZulu-Natal, Durban 4001, South Africa. Email: [albericio@ukzn.ac.za](mailto:albericio@ukzn.ac.za). Phone: +27 614 009 144

Before swelling

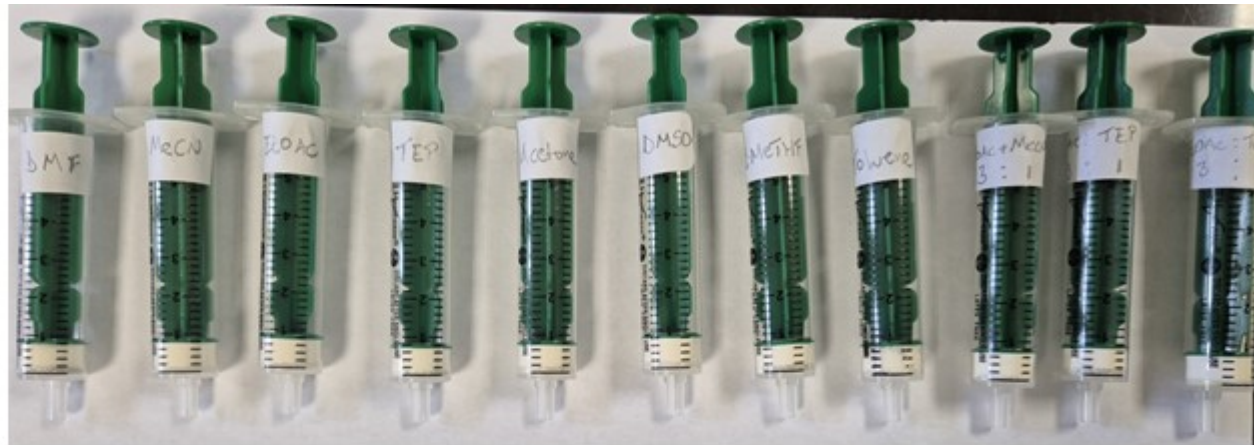

After swelling

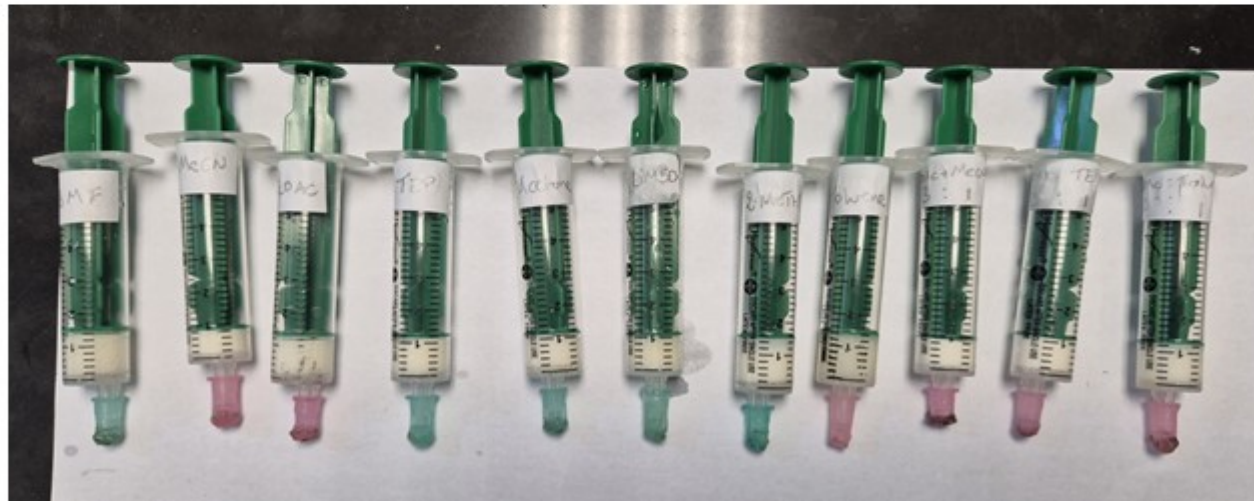

Figure S11. Swelling study of AM-SMPS-Resin in different solvents before and after 30 mins

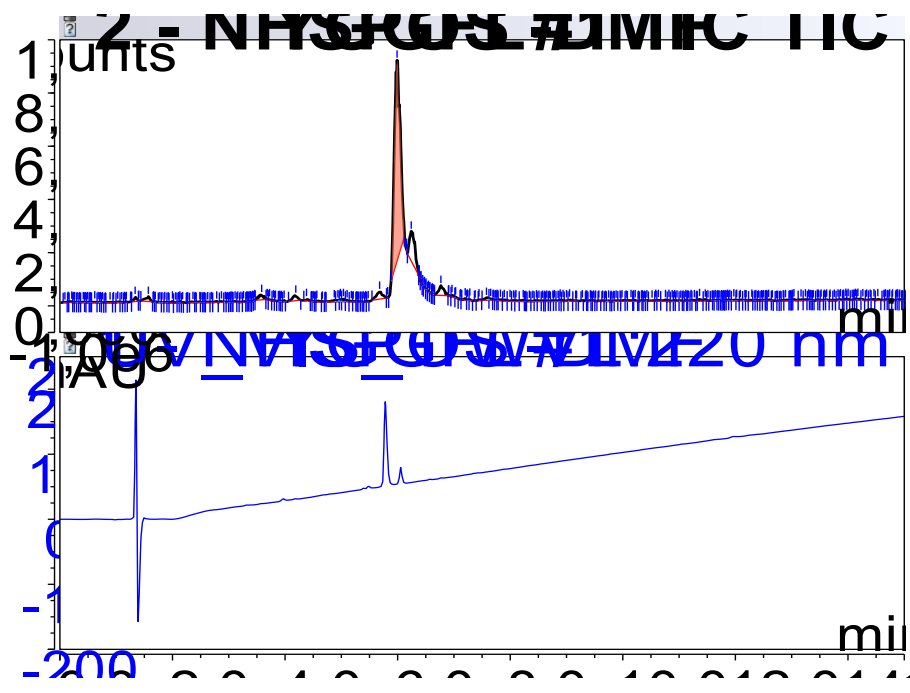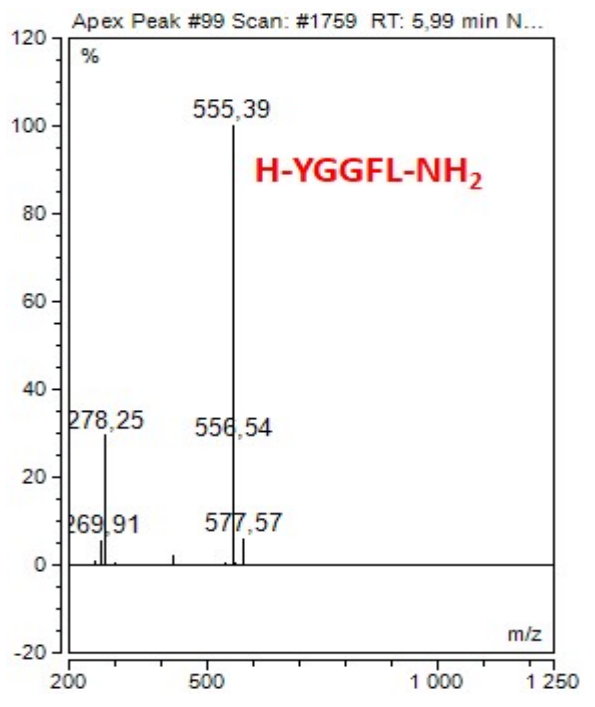

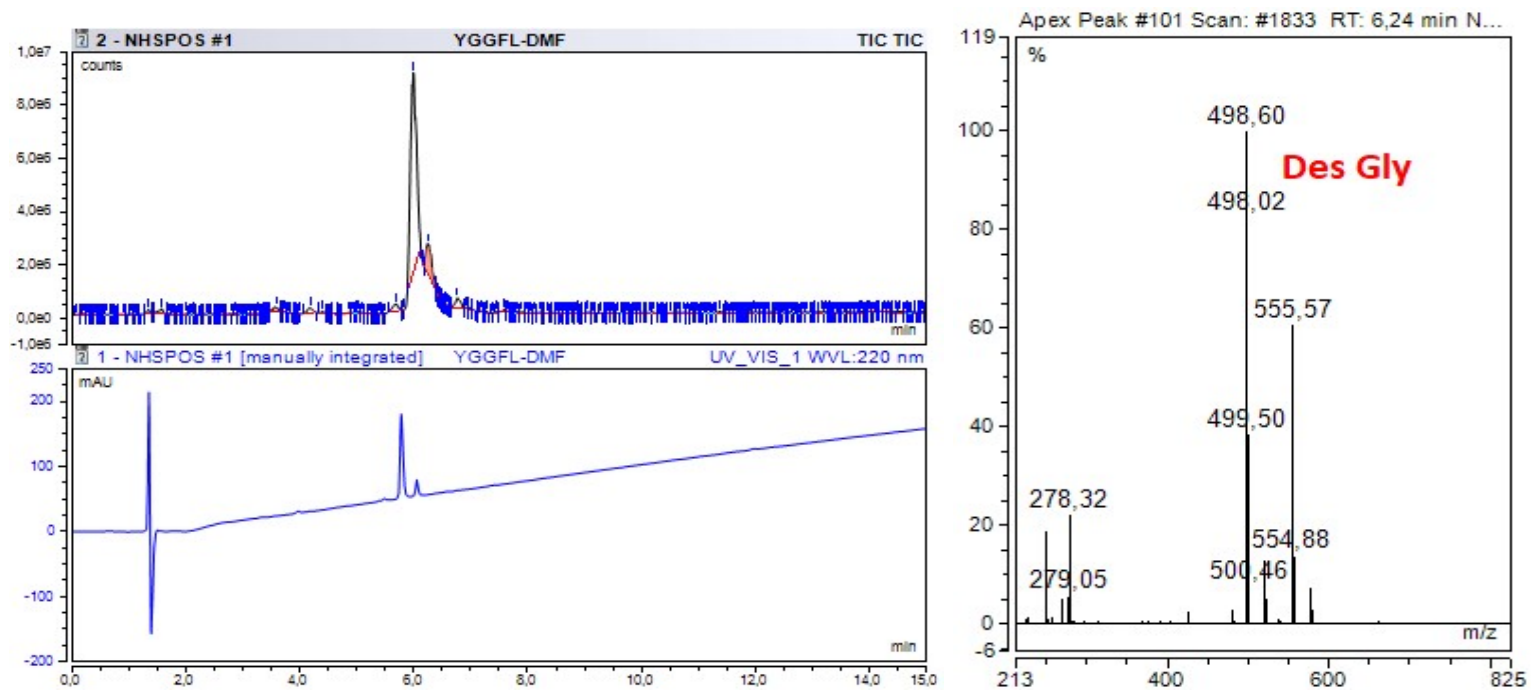

**Figure SI2.** LC-MS of H-YGGFL-NH<sub>2</sub> synthesised in DMF at room temperature. Gradient: 5–60 % B into A in 15 min; flow rate: 1 mL/min; detection at 220 nm.

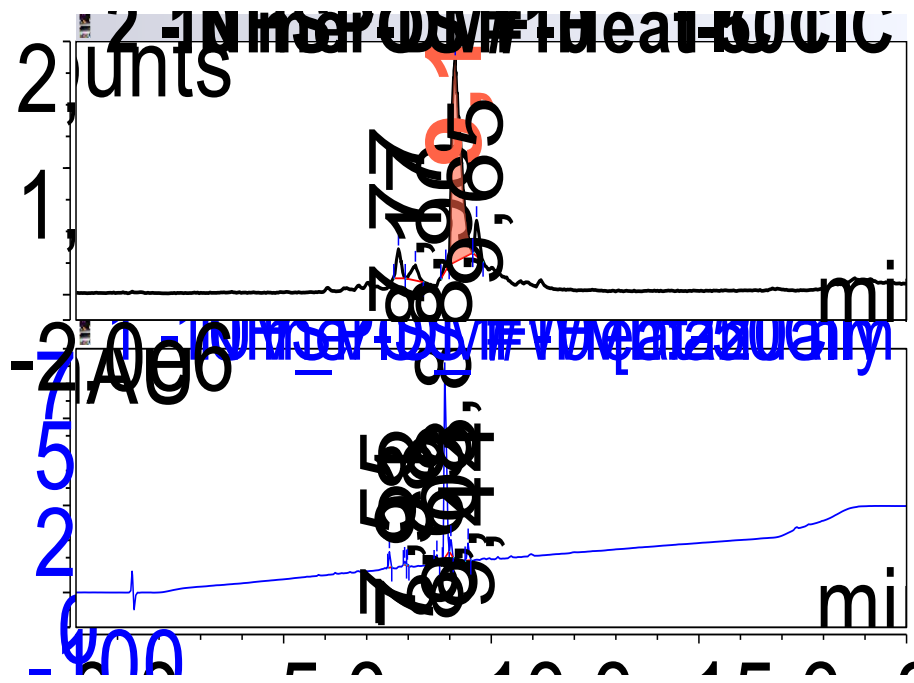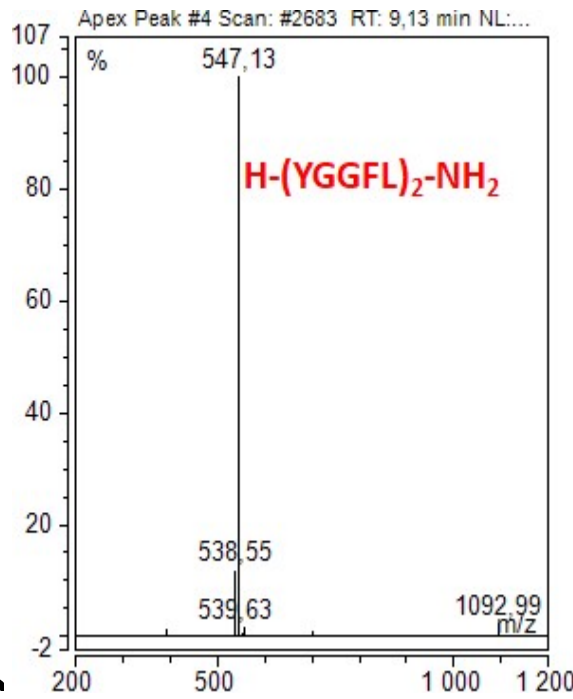

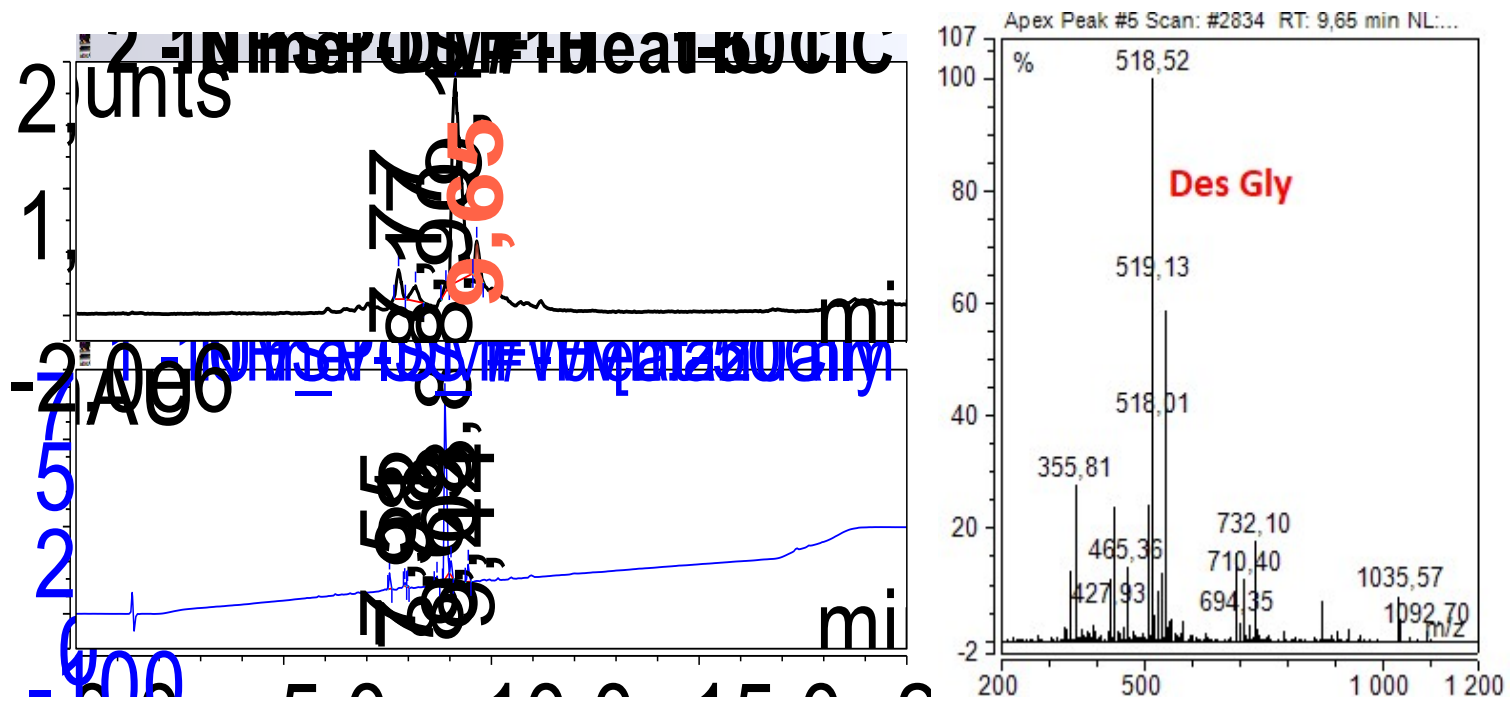

Figure SI3. LC-MS of H-(YGGFL)<sub>2</sub>-NH<sub>2</sub> synthesised in DMF at 50°C. Gradient: 5–60 % B into A in 15 min; flow rate: 1 mL/min; detection at 220 nm.

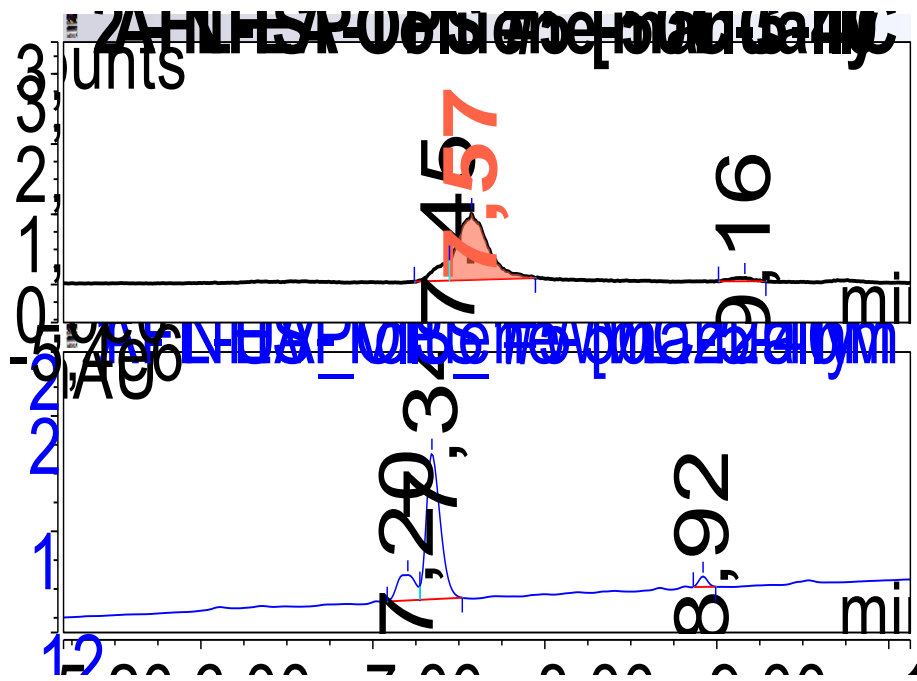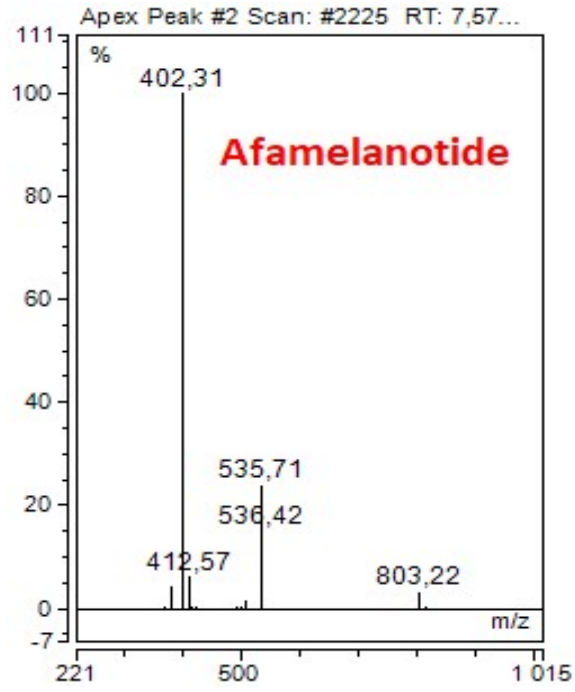

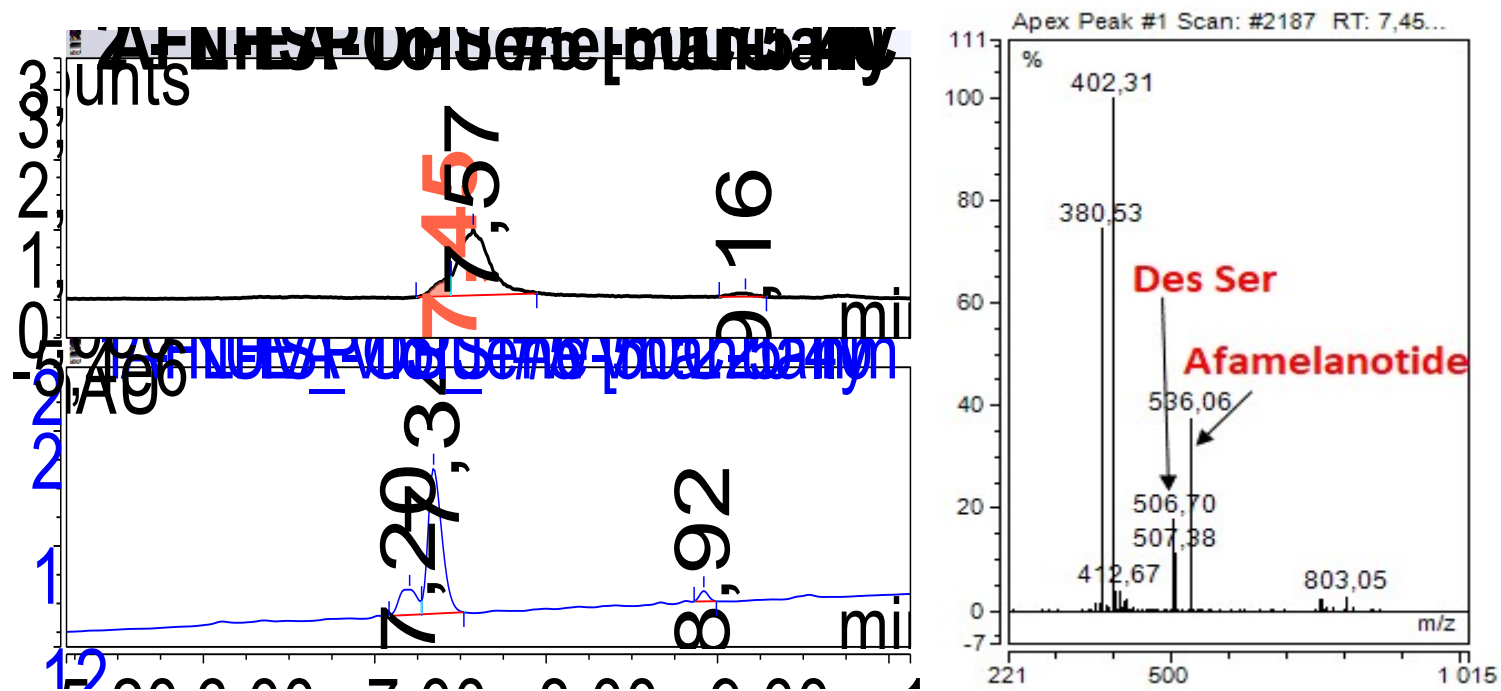

**Figure SI4.** LC-MS of Afamelanotide synthesised at 50°C in EtOAc:Toluene (3:1). Gradient: 5–40 % B into A in 15 min; flow rate: 1 mL/min; detection at 220 nm.

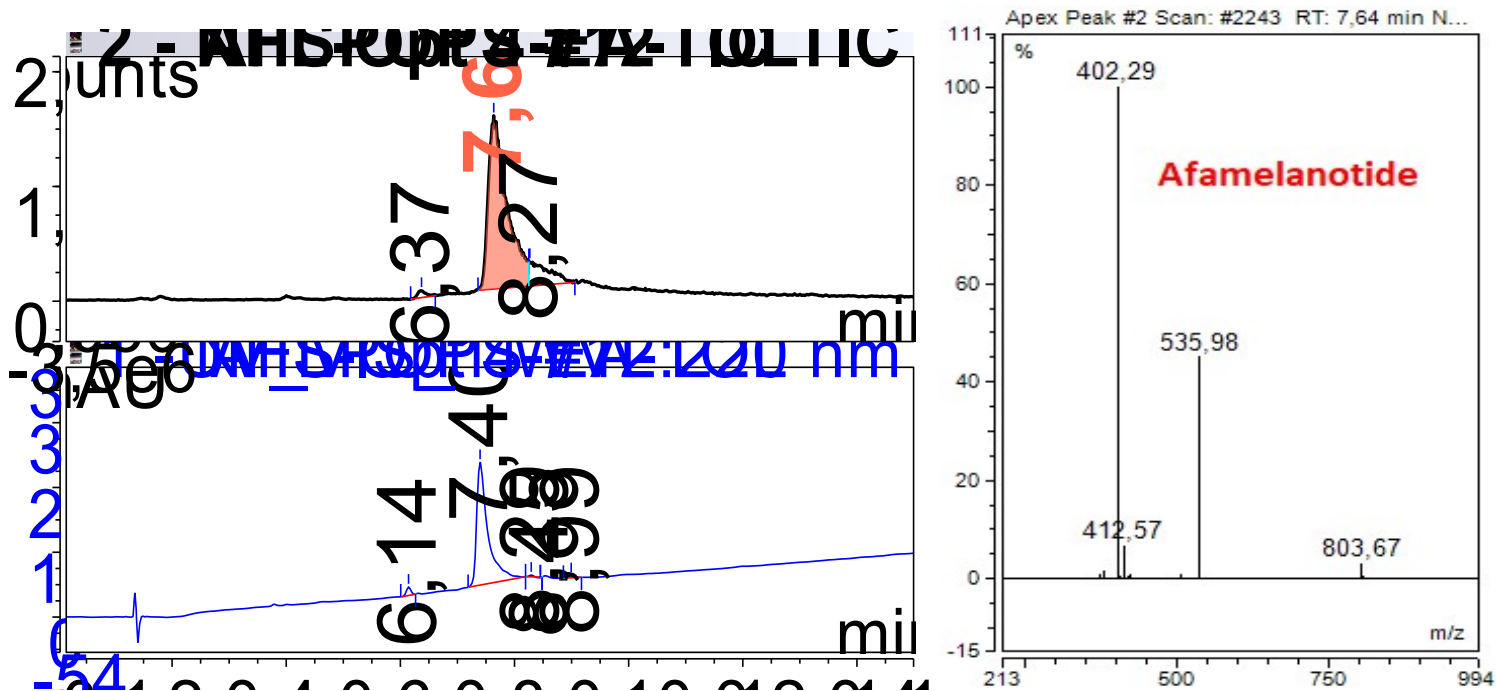

**Figure SI5.** LC-MS of Afamelanotide synthesised at 50°C in EtOAc:Toluene (3:1) after optimization. Gradient: 5–40 % B into A in 15 min; flow rate: 1 mL/min; detection at 220 nm.
